# Supplementary material for: Hydrogen-induced tunable electronic and optical properties of a two-dimensional penta-Pt2N4 monolayer
Source: Royal Society of Chemistry journal article supplement (doi:10.1039/d1cp00681a), 2021-01-01
Supplement: d1cp00681a1.pdf [file d1cp00681a1.pdf]

## **Supplementary Information**

### **Hydrogen-Induced Tunable Electronic and Optical Properties of Two-Dimensional Penta-Pt<sub>2</sub>N<sub>4</sub> Monolayer**

Vipin Kumar<sup>1,\*</sup>, Aditya Dey<sup>2</sup>, Siby Thomas<sup>3</sup>, Mohsen Asle Zaeem<sup>3,\*</sup>, Debesh R. Roy<sup>1,\*</sup>

<sup>1</sup>Materials and Biophysics Group, Department of Applied Physics, S. V. National Institute of Technology, Surat 395007, India

<sup>2</sup>Department of Physics, Indian Institute of Technology Patna, Bihar-801106, India

<sup>3</sup>Department of Mechanical Engineering, Colorado School of Mines, 1500 Illinois St., Golden CO-80401, USA

**\*Corresponding authors:** [vipinkumar0247@gmail.com](mailto:vipinkumar0247@gmail.com) (VK); [zaeem@mines.edu](mailto:zaeem@mines.edu) (MAZ);  
[drd@phy.svnit.ac.in](mailto:drd@phy.svnit.ac.in) (DRR)

#### **CONTENTS**

**Figure S1.** The band diagram of hydrogenation on Pt atoms (penta-Pt<sub>2</sub>N<sub>4</sub>)

**Figure S2.** The snapshots of hydrogenated Pt<sub>2</sub>N<sub>4</sub> at the end of 5 ps AIMD simulations at 300 K, 500 K, 700 K, and 1100 K.

**Figure S3.** Fluctuation in total potential energy and temperature during the AIMD simulation of hydrogenated Pt<sub>2</sub>N<sub>4</sub> at temperatures of 300 K, 500 K, 700 K, and 1000 K.

**Figure S4.** The snapshots of hydrogenated Pt<sub>2</sub>N<sub>4</sub> at the end of 5 ps AIMD simulations at 1300 K and 1500 K.

**Figure S5.** Fluctuation in total potential energy and temperature during the AIMD simulation of hydrogenated Pt<sub>2</sub>N<sub>4</sub> at 1300 K and 1500 K.

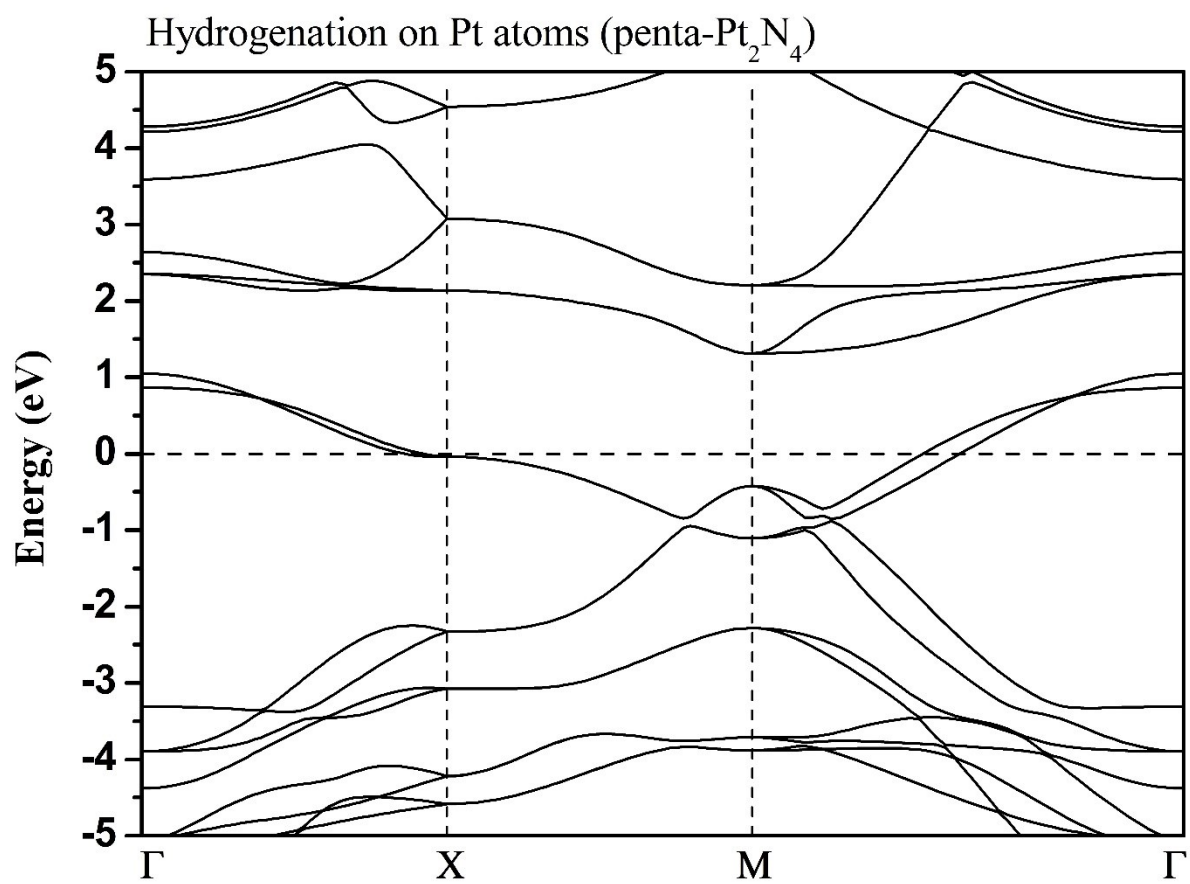

Figure S1. The band diagram of hydrogenation on Pt atoms (penta-Pt<sub>2</sub>N<sub>4</sub>)

(a) 300 K

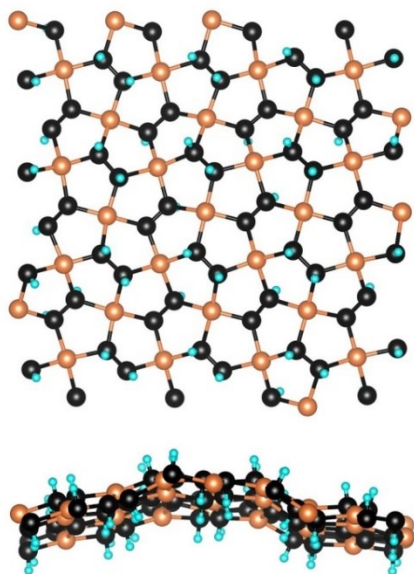

(b) 500 K

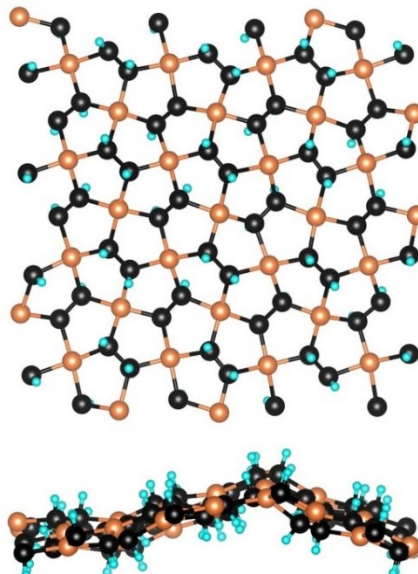

(c) 700 K

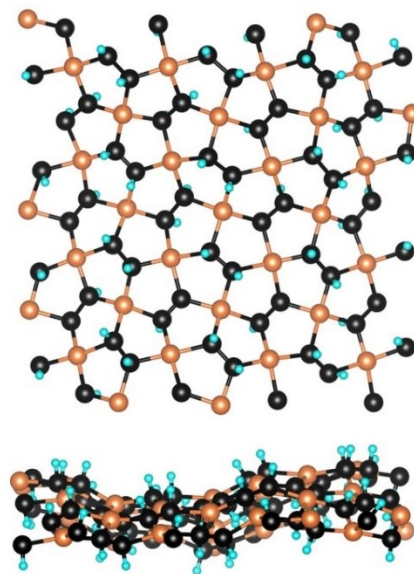

(d) 1100 K

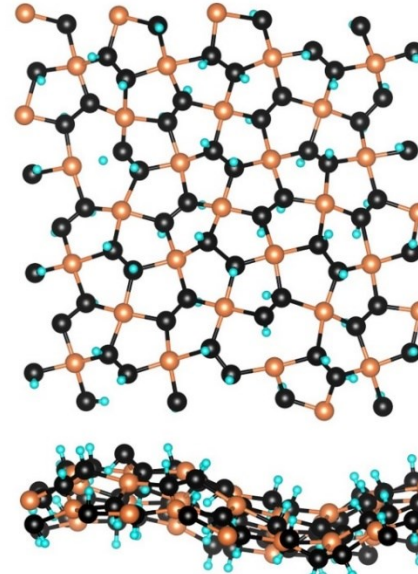

**Figure S2.** The snapshots of hydrogenated Pt<sub>2</sub>N<sub>4</sub> at the end of 5 ps AIMD simulations at 300 K, 500 K, 700 K, and 1100 K.

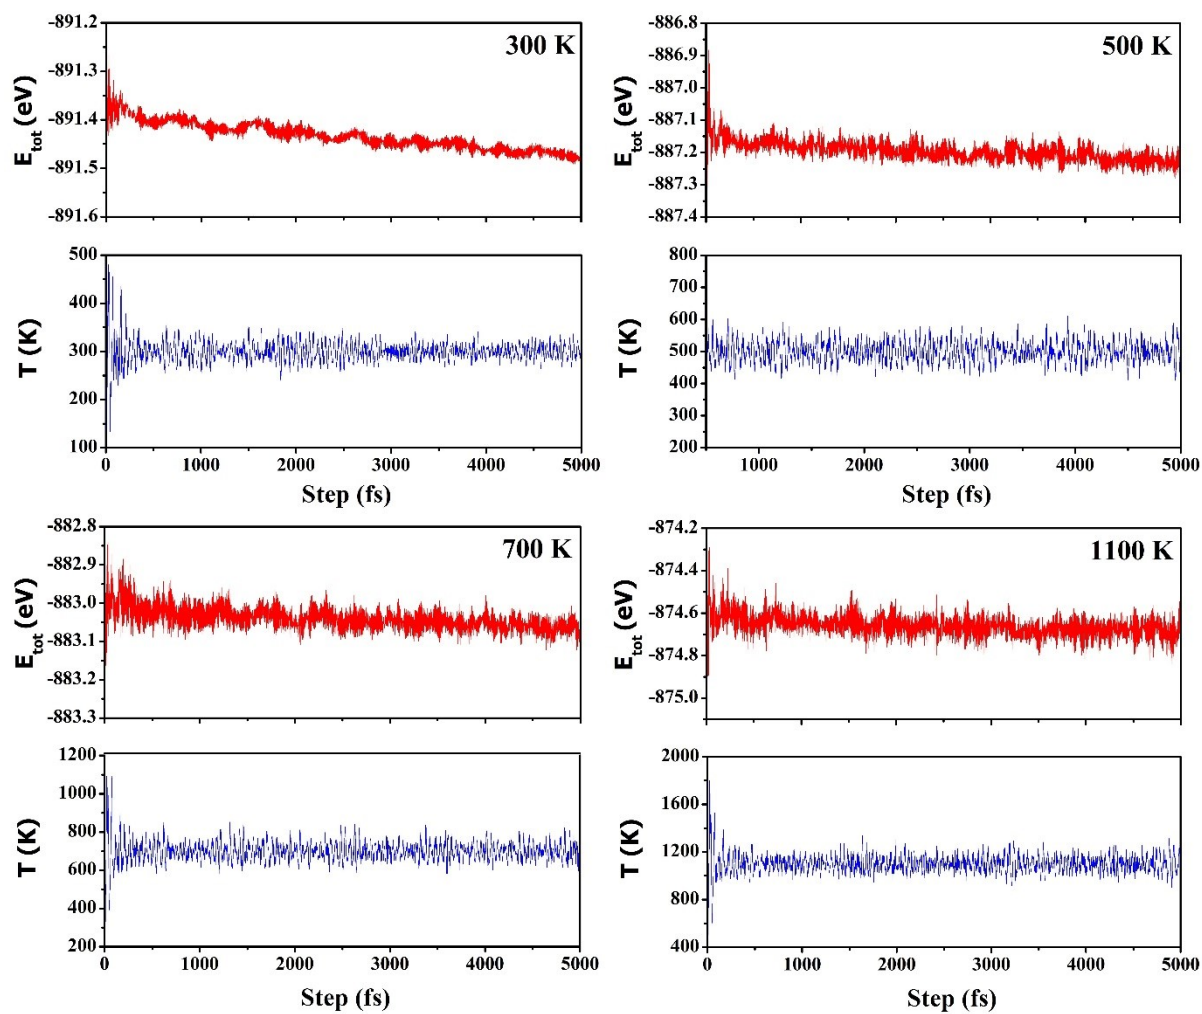

**Figure S3.** Fluctuation in total potential energy and temperature during the AIMD simulation of hydrogenated  $\text{Pt}_2\text{N}_4$  at temperatures of 300 K, 500 K, 700 K, and 1000 K.

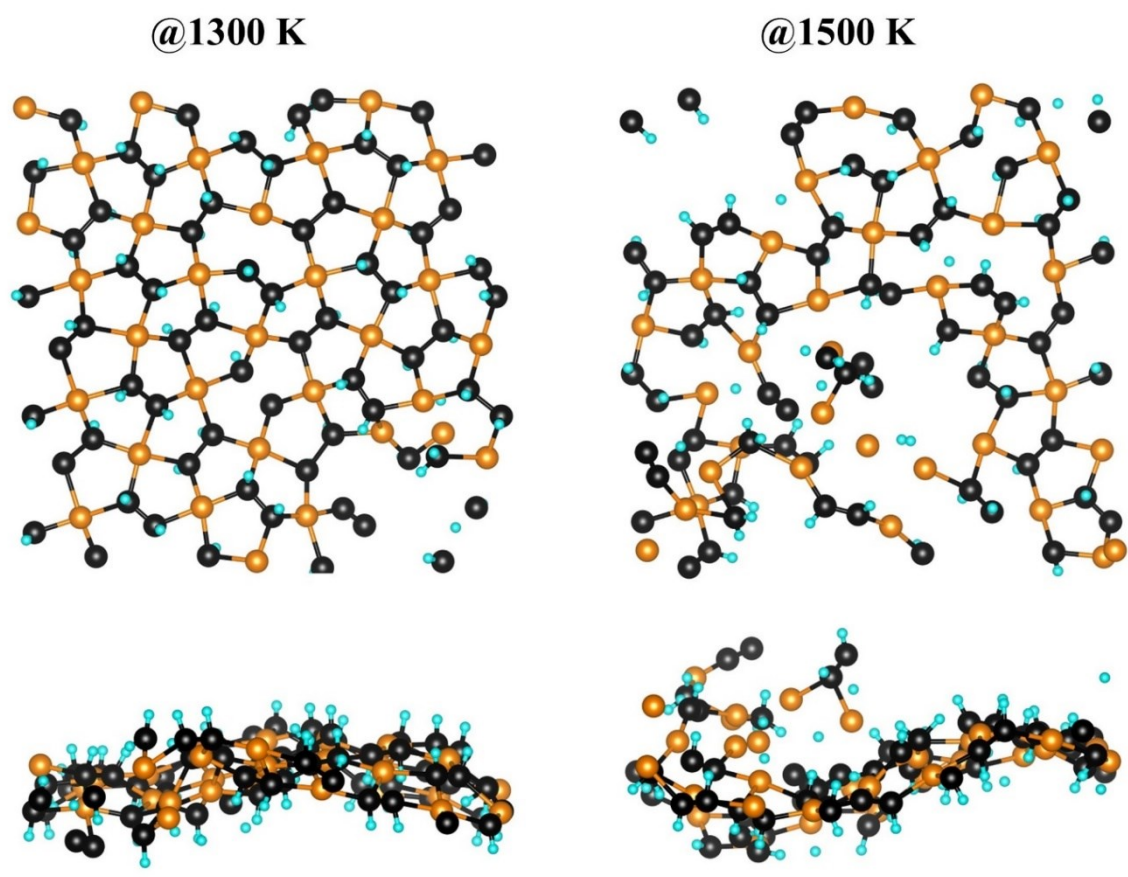

**Figure S4.** The snapshots of hydrogenated Pt<sub>2</sub>N<sub>4</sub> at the end of 5 ps AIMD simulations at 1300 K and 1500 K.

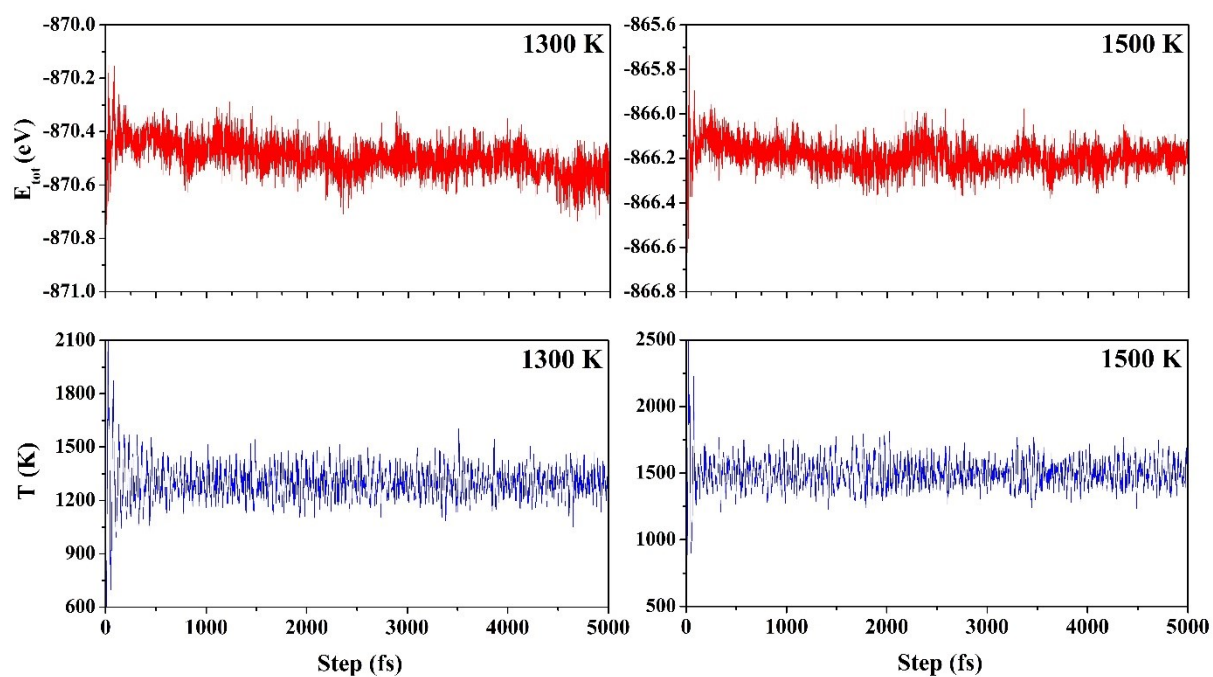

**Figure S5.** Fluctuation in total potential energy and temperature during the AIMD simulation of hydrogenated  $\text{Pt}_2\text{N}_4$  at 1300 K and 1500 K.
